# Supplementary material for: Physio-Biochemical Integrators and Transcriptome Analysis Reveal Nano-Elicitation Associated Response during Dendrocalamus asper (Schult. and Schult. F.) Backer ex K. Heyne Micropropagation
Source: MDPI journal article supplement (doi:10.3390/genes14091725), 2023-08-29
Supplement: s1 [file s1]

**SupplementaryTable S1:** Sequencing Data Report (Raw data)

| S. No. | Sample Name      | No. of Reads | Sequence Length | %GC |
|--------|------------------|--------------|-----------------|-----|
| 1.     | AN1_S4_R1.fastq  | 18989168     | 35-149          | 53  |
| 2.     | AN1_S4_R2.fastq  | 18989168     | 35-149          | 51  |
| 3.     | AN2_S10_R1.fastq | 8571000      | 35-149          | 52  |
| 4.     | AN2_S10_R2.fastq | 8571000      | 35-149          | 50  |
| 5.     | AN3_S16_R1.fastq | 26131133     | 35-149          | 53  |
| 6.     | AN3_S16_R2.fastq | 26131133     | 35-149          | 50  |
| 7.     | AN4_S22_R1.fastq | 8883367      | 35-149          | 53  |
| 8.     | AN4_S22_R2.fastq | 8883367      | 35-149          | 50  |
| 9.     | AN5_S27_R1.fastq | 3918968      | 35-149          | 53  |
| 10.    | AN5_S27_R2.fastq | 3918968      | 35-149          | 50  |
| 11.    | AN6_S33_R1.fastq | 11685059     | 35-149          | 51  |
| 12.    | AN6_S33_R2.fastq | 11685059     | 35-149          | 48  |
| 13.    | AN7_S39_R1.fastq | 15234475     | 35-149          | 56  |
| 14.    | AN7_S39_R2.fastq | 15234475     | 35-149          | 53  |
| 15.    | AN8_S50_R1.fastq | 17584435     | 35-149          | 53  |
| 16.    | AN8_S50_R2.fastq | 17584435     | 35-149          | 51  |
| 17.    | AN9_S5_R1.fastq  | 16307257     | 35-149          | 54  |
| 18.    | AN9_S5_R2.fastq  | 16307257     | 35-149          | 52  |
|        |                  |              |                 |     |
