# Supplementary material for: Physio-Biochemical Integrators and Transcriptome Analysis Reveal Nano-Elicitation Associated Response during Dendrocalamus asper (Schult. and Schult. F.) Backer ex K. Heyne Micropropagation
Source: MDPI journal article supplement (doi:10.3390/genes14091725), 2023-08-29
Supplement: s1 [file s1]

**Supplementary Table S2:** Sequencing Data Report (High Quality trimmed data)

| S. No. | Sample Name      | No. of Reads | Sequence_Length | %GC |
|--------|------------------|--------------|-----------------|-----|
| 1.     | AN1 S4 R1.fastq  | 17701746     | 54-134          | 54  |
| 2.     | AN1 S4 R2.fastq  | 17701746     | 54-134          | 49  |
| 3.     | AN2 S10 R1.fastq | 8009089      | 54-134          | 53  |
| 4.     | AN2 S10 R2.fastq | 8009089      | 54-134          | 48  |
| 5.     | AN3 S16 R1.fastq | 24406137     | 54-134          | 53  |
| 6.     | AN3 S16 R2.fastq | 24406137     | 54-134          | 49  |
| 7.     | AN4 S22 R1.fastq | 7520155      | 54-134          | 53  |
| 8.     | AN4 S22 R2.fastq | 7520155      | 54-134          | 48  |
| 9.     | AN5 S27 R1.fastq | 3670833      | 54-134          | 54  |
| 10.    | AN5 S27 R2.fastq | 3670833      | 54-134          | 49  |
| 11.    | AN6 S33 R1.fastq | 11211587     | 54-134          | 50  |
| 12.    | AN6 S33 R2.fastq | 11211587     | 54-134          | 47  |
| 13.    | AN7 S39 R1.fastq | 14246009     | 54-134          | 56  |
| 14.    | AN7 S39 R2.fastq | 14246009     | 54-134          | 52  |
| 15.    | AN8 S50 R1.fastq | 16518686     | 54-134          | 54  |
| 16.    | AN8 S50 R2.fastq | 16518686     | 54-134          | 50  |
| 17.    | AN9 S5 R1.fastq  | 14838377     | 54-134          | 54  |
| 18.    | AN9 S5 R2.fastq  | 14838377     | 54-134          | 50  |
